# Supplementary material for: Tuning of physico-chemical characteristics of charged micelles by controlling head group interactions via hydrophobically and sterically modified counter ions
Source: Royal Society of Chemistry journal article supplement (doi:10.1039/c4ra03937h), 2014-01-01
Supplement: c4ra03937h1.pdf [file c4ra03937h1.pdf]

## Supplementary Information

**Tuning of physico-chemical characteristics of charged micelles by controlling head group interactions via hydrophobically and sterically modified counter ions.**

**Subrata Chakraborty, Amitabha Chakraborty and Swapan K. Saha\***

*Department of Chemistry, University of North Bengal,  
Raja Rammohanpur, Darjeeling, West Bengal 734 013, INDIA*

\*Author for Correspondance:

Professor Swapan K Saha  
Department of Chemistry  
University of North Bengal  
Raja Rammohanpur, Darjeeling  
West Bengal 734 013, India  
Ph: +91353-2699 425  
Fax: +91353-2699 001  
E-mail: [ssahanbu@hotmail.com](mailto:ssahanbu@hotmail.com)

## Table of contents

|                                                                                                                                    |    |
|------------------------------------------------------------------------------------------------------------------------------------|----|
| 1. Plots of surface tension vs. log C of tetraammonium dodecylbenzene sulfonate (TADBS) at different temperatures:.....            | 3  |
| 2. Plots of surface tension vs. log C of tetraethylammonium dodecylbenzene sulfonate (TEADBS) at different temperatures:.....      | 4  |
| 3. Plots of surface tension vs. log C of tetrapropylammonium dodecylbenzene sulfonate (TPADBS) at different temperatures:.....     | 5  |
| 4. Plots of surface tension vs. log C of tetrabutylammonium dodecylbenzene sulfonate (TBADBS) at different temperatures:.....      | 6  |
| 5. Plots of conductance vs. concentration of tetraammonium dodecylbenzene sulfonate (TADBS) at different temperatures:.....        | 7  |
| 6. Plots of conductance vs. concentration of tetramethylammonium dodecylbenzene sulfonate (TMADBS) at different temperatures:..... | 8  |
| 7. Plots of conductance vs. concentration of tetraethylammonium dodecylbenzene sulfonate (TEADBS) at different temperatures:.....  | 9  |
| 8. Plots of conductance vs. concentration of tetrapropylammonium dodecylbenzene sulfonate (TPADBS) at different temperatures:..... | 10 |
| 9. Plots of conductance vs. concentration of tetrabutylammonium dodecylbenzene sulfonate (TBADBS) at different temperatures:.....  | 11 |
| 10. Fluorescence Spectra of TADBS with different concentration of CPC.                                                             | 12 |
| 11. Log ( $I_0/I$ ) Vs Concentration (mM) plot of TADBS.                                                                           | 12 |
| 12. Fluorescence Spectra of TMADBS with different concentration of CPC.                                                            | 13 |
| 13. Log ( $I_0/I$ ) Vs Concentration (mM) plot of TMADBS.                                                                          | 13 |
| 14. Fluorescence Spectra of TPADBS with different concentration of CPC.                                                            | 14 |
| 15. Log ( $I_0/I$ ) Vs Concentration (mM) plot of TPADBS.                                                                          | 14 |
| 16. Fluorescence Spectra of TBADBS with different concentration of CPC.                                                            | 15 |
| 17. Log ( $I_0/I$ ) Vs Concentration (mM) plot of TBADBS.                                                                          | 15 |

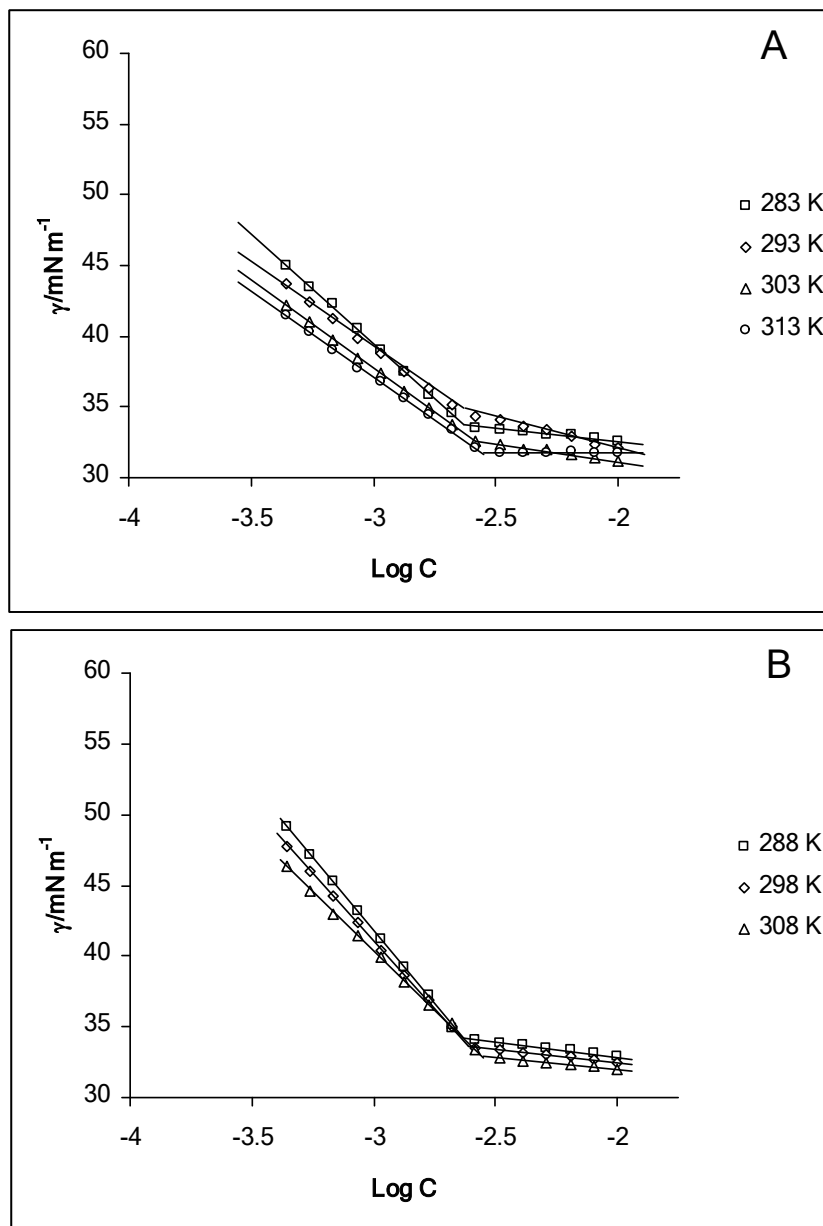

**Figure 3.4:** Surface tension,  $\gamma$ , of Ammonium dodecyl benzene sulfonate (ADBS) in aqueous solution as a function of the logarithm of the surfactant concentration at different temperatures (A: temperature 283K, 293K, 303K, 313K), (B: temperature 288K, 298K, 308K).

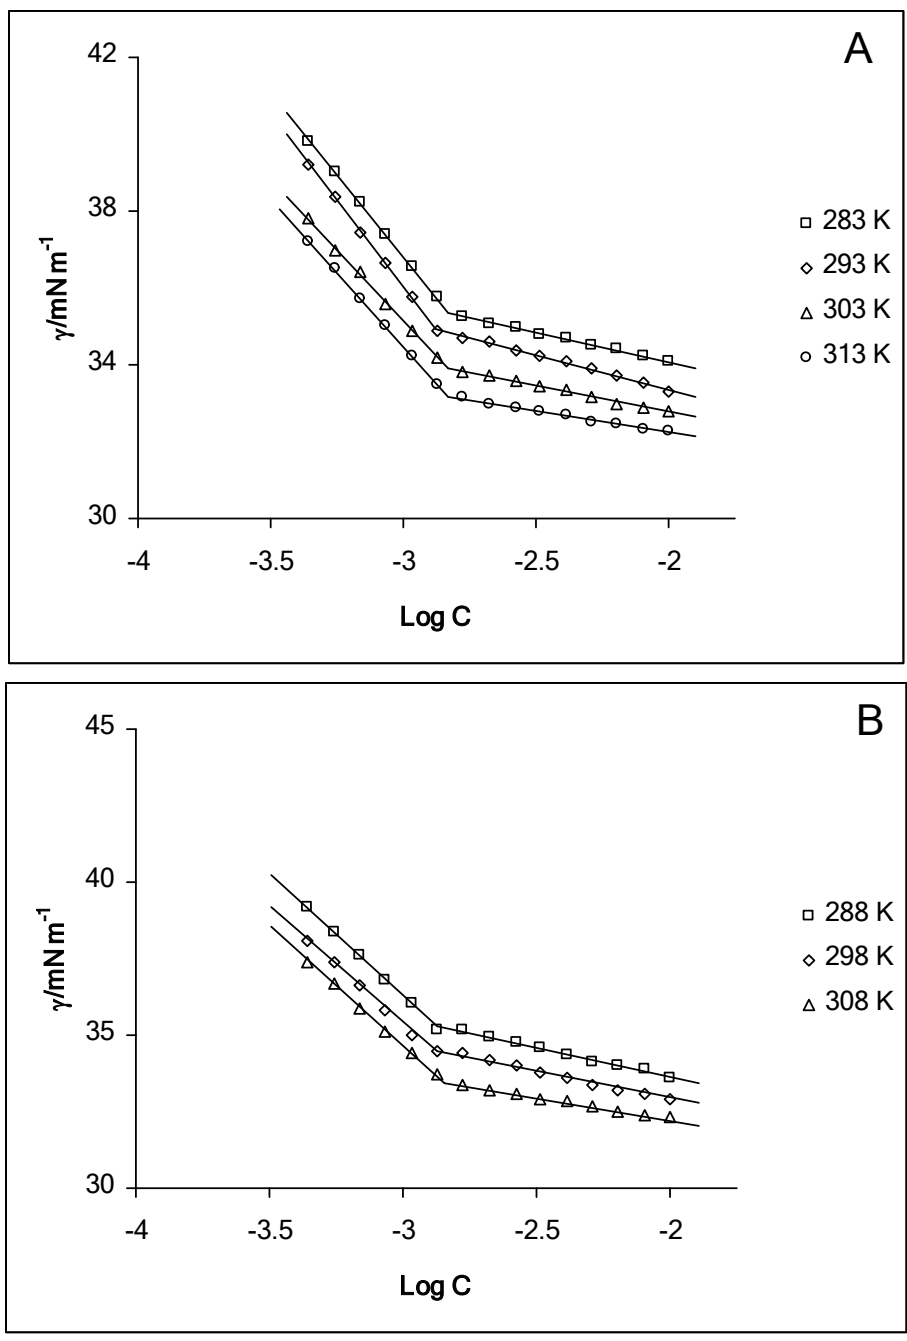

**Figure 3.6:** Surface tension,  $\gamma$ , of Tetraethylammonium dodecyl benzene sulfonate (TEADBS) in aqueous solution as a function of the logarithm of the surfactant concentration at different temperatures (A: temperature 283K, 293K, 303K, 313K), (B: temperature 288K, 298K, 308K).

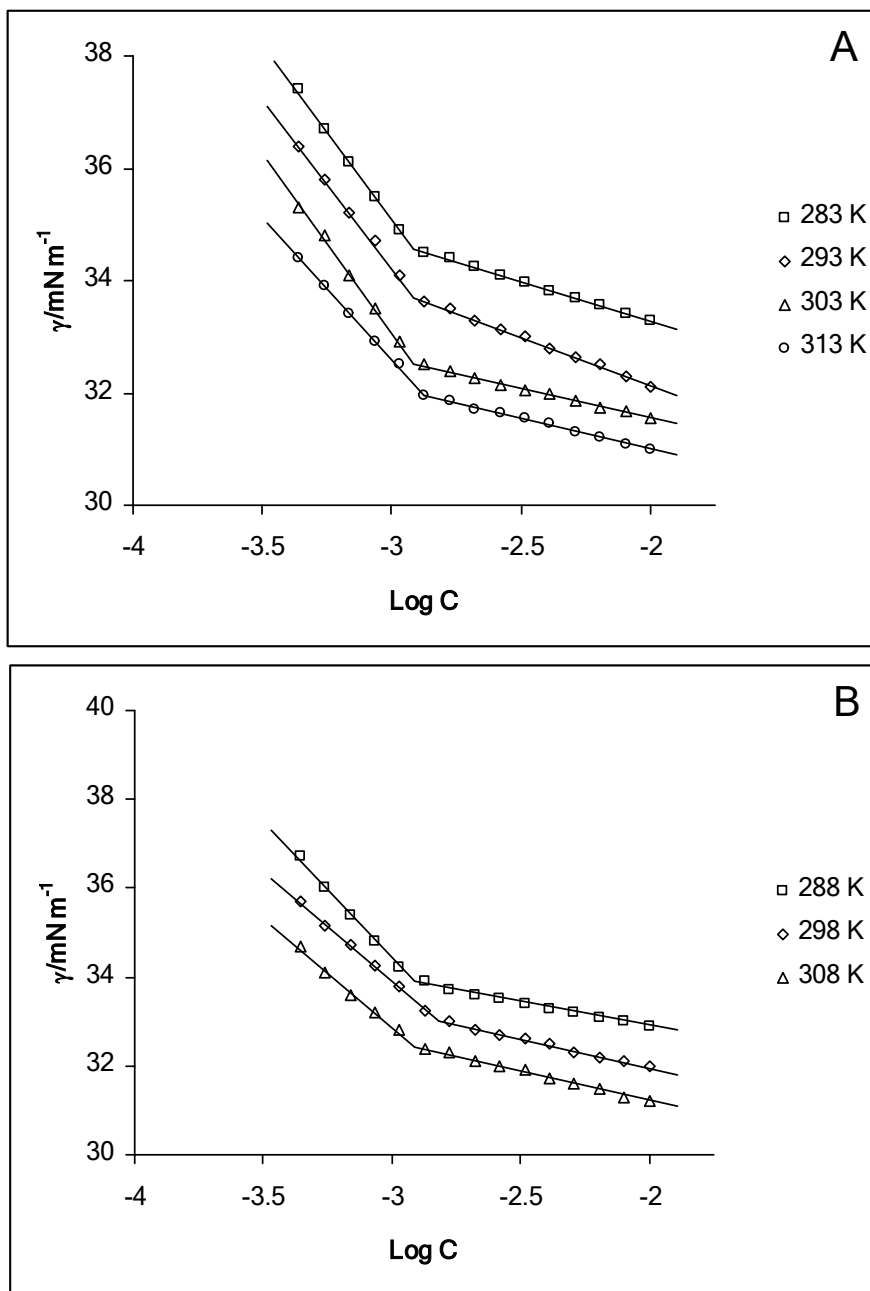

**Figure 3.7:** Surface tension,  $\gamma$ , of Tetrapropylammonium dodecyl benzene sulfonate (TPADBS) in aqueous solution as a function of the logarithm of the surfactant concentration at different temperatures (A: temperature 283K, 293K, 303K, 313K), (B: temperature 288K, 298K, 308K).

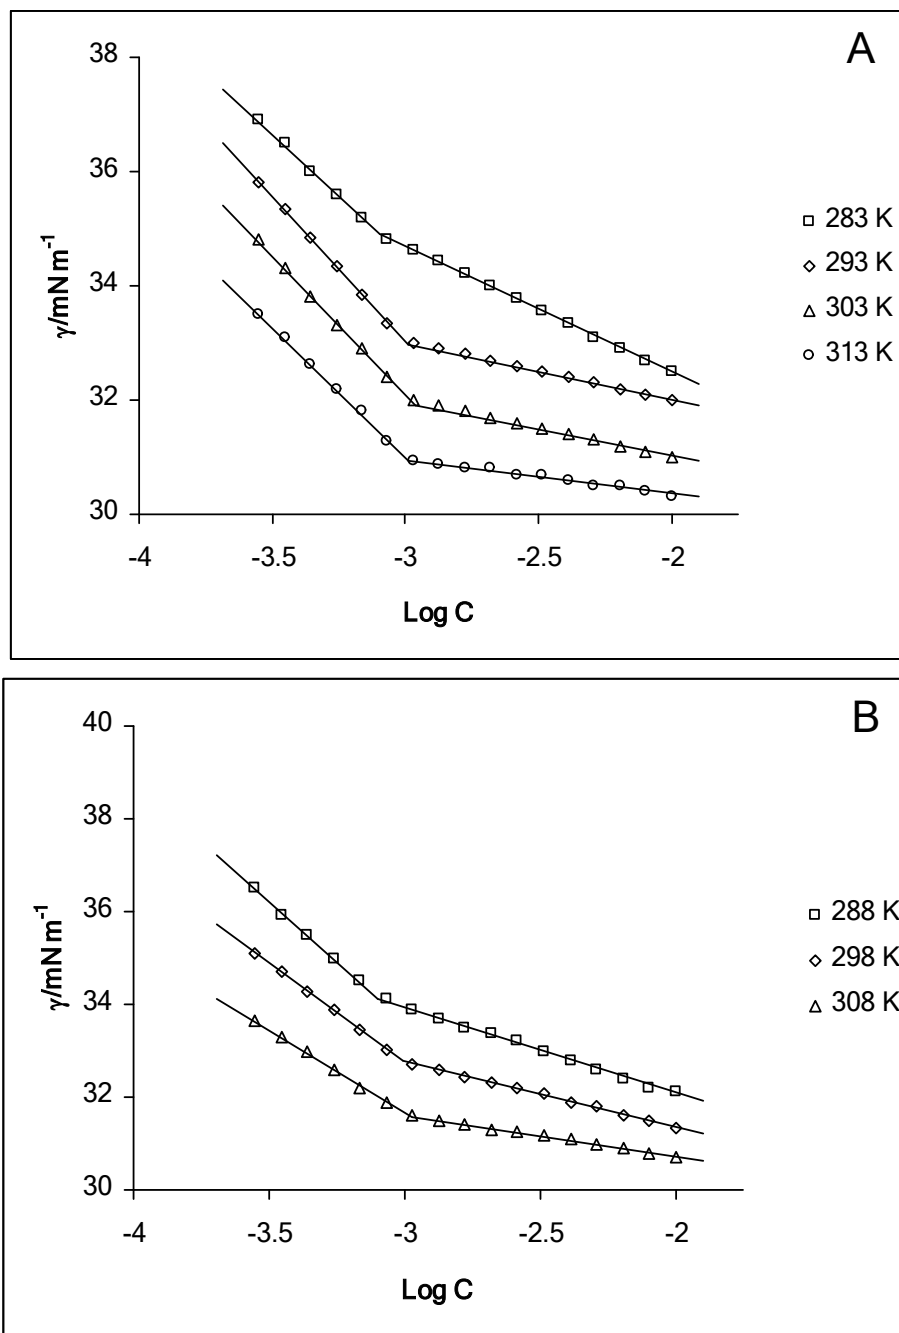

**Figure 3.8:** Surface tension,  $\gamma$ , of Tetrabutylammonium dodecyl benzene sulfonate (TBADBS) in aqueous solution as a function of the logarithm of the surfactant concentration at different temperatures (A: temperature 283K, 293K, 303K, 313K), (B: temperature 288K, 298K, 308K).

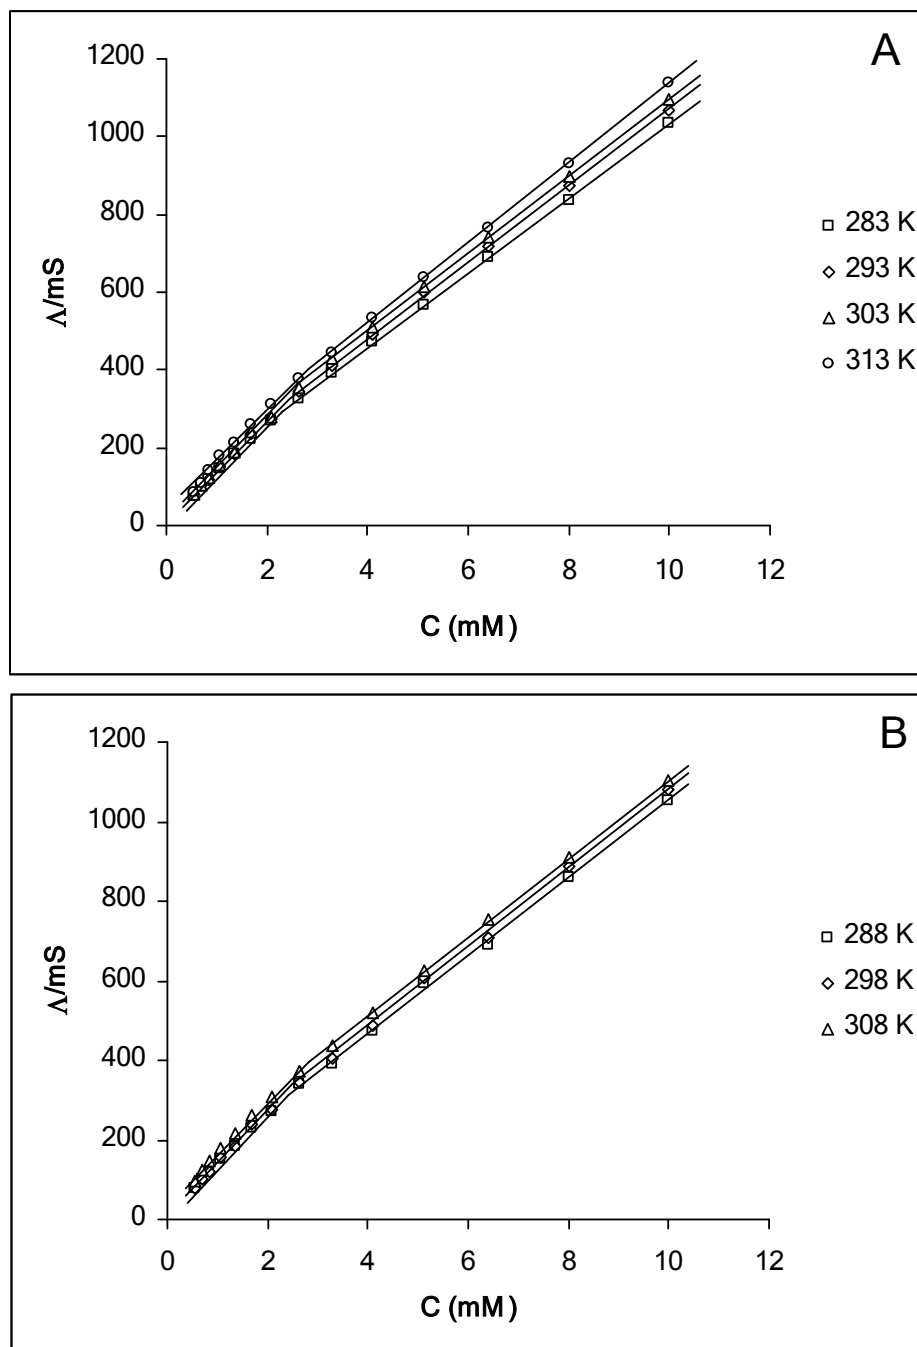

**Figure 3.12:** Conductance,  $\Lambda$ , of Ammonium dodecyl benzene sulfonate (ADBS) in aqueous solution as a function of the surfactant concentration at different temperatures (A: temperature 283K, 293K, 303K, 313K), (B: temperature 288K, 298K, 308K).

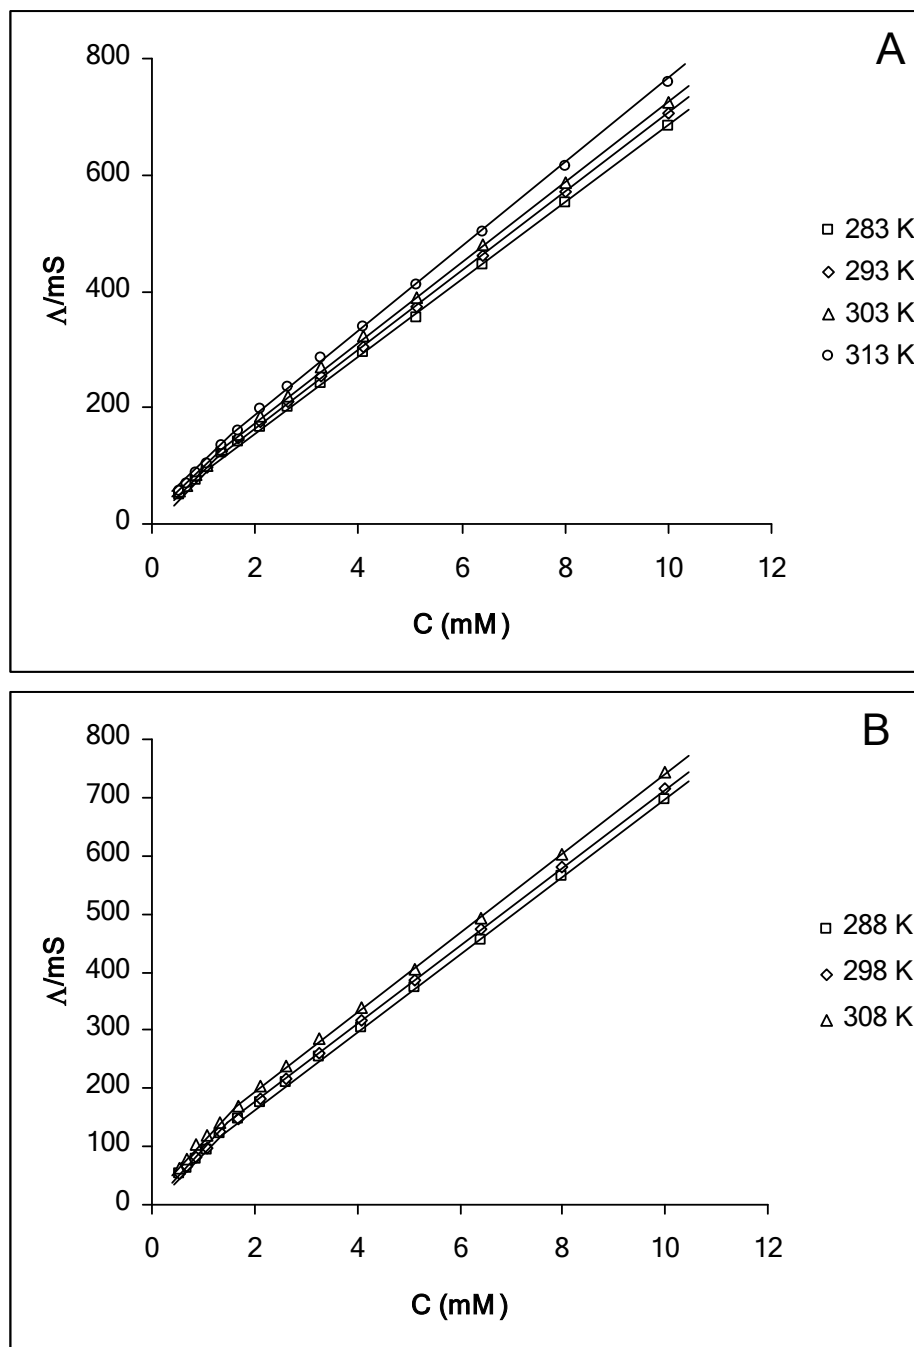

**Figure 3.13:** Conductance,  $\Lambda$ , of Tetramethylammonium dodecyl benzene sulfonate (TMADBS) in aqueous solution as a function of the surfactant concentration at different temperatures (A: temperature 283K, 293K, 303K, 313K), (B: temperature 288K, 298K, 308K).



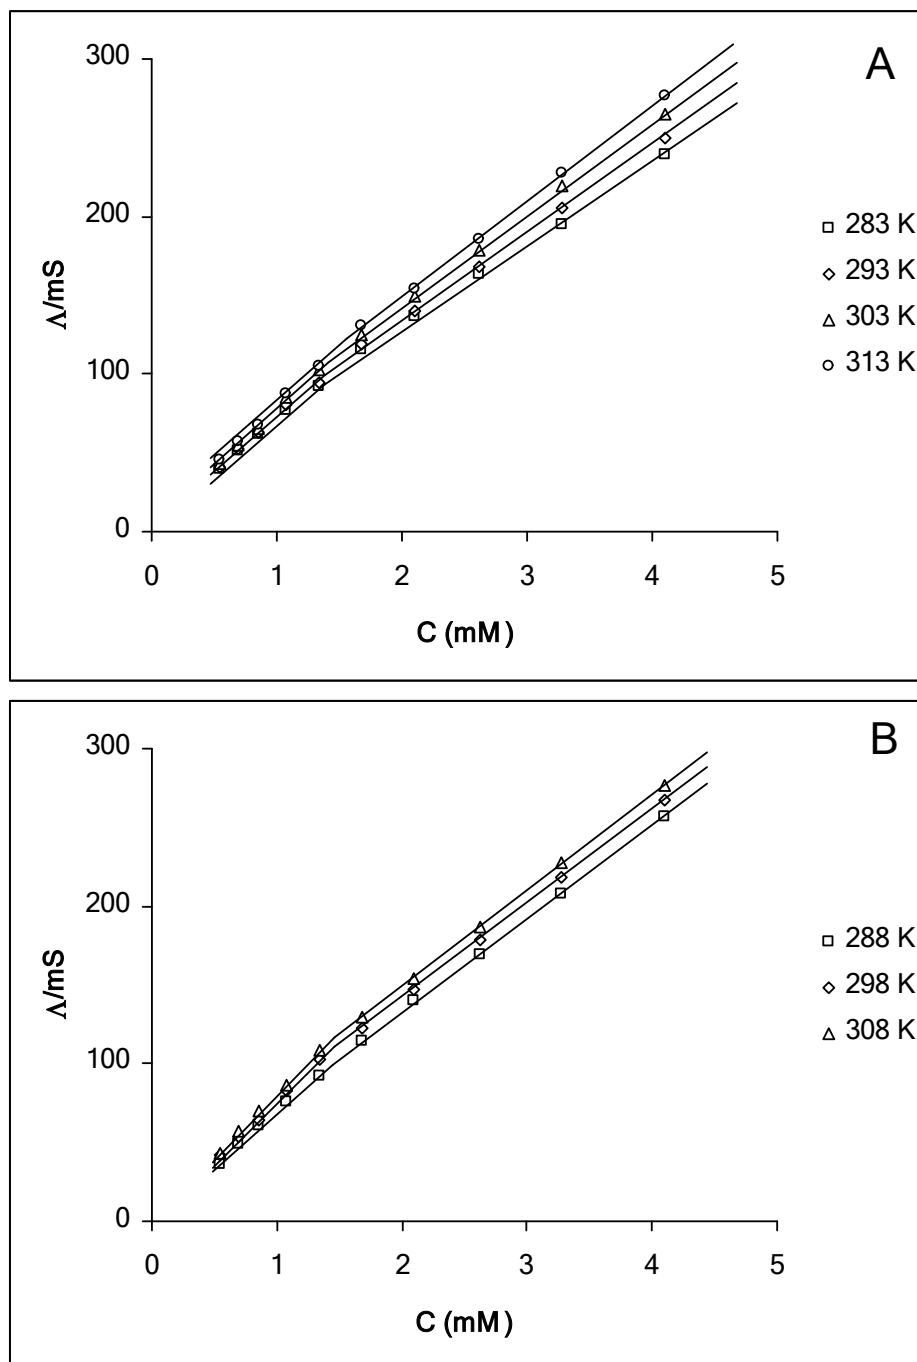

**Figure 3.14:** Conductance,  $\Lambda$ , of Tetraethylammonium dodecyl benzene sulfonate (TEADBS) in aqueous solution as a function of the surfactant concentration at different temperatures (A: temperature 283K, 293K, 303K, 313K), (B: temperature 288K, 298K, 308K).

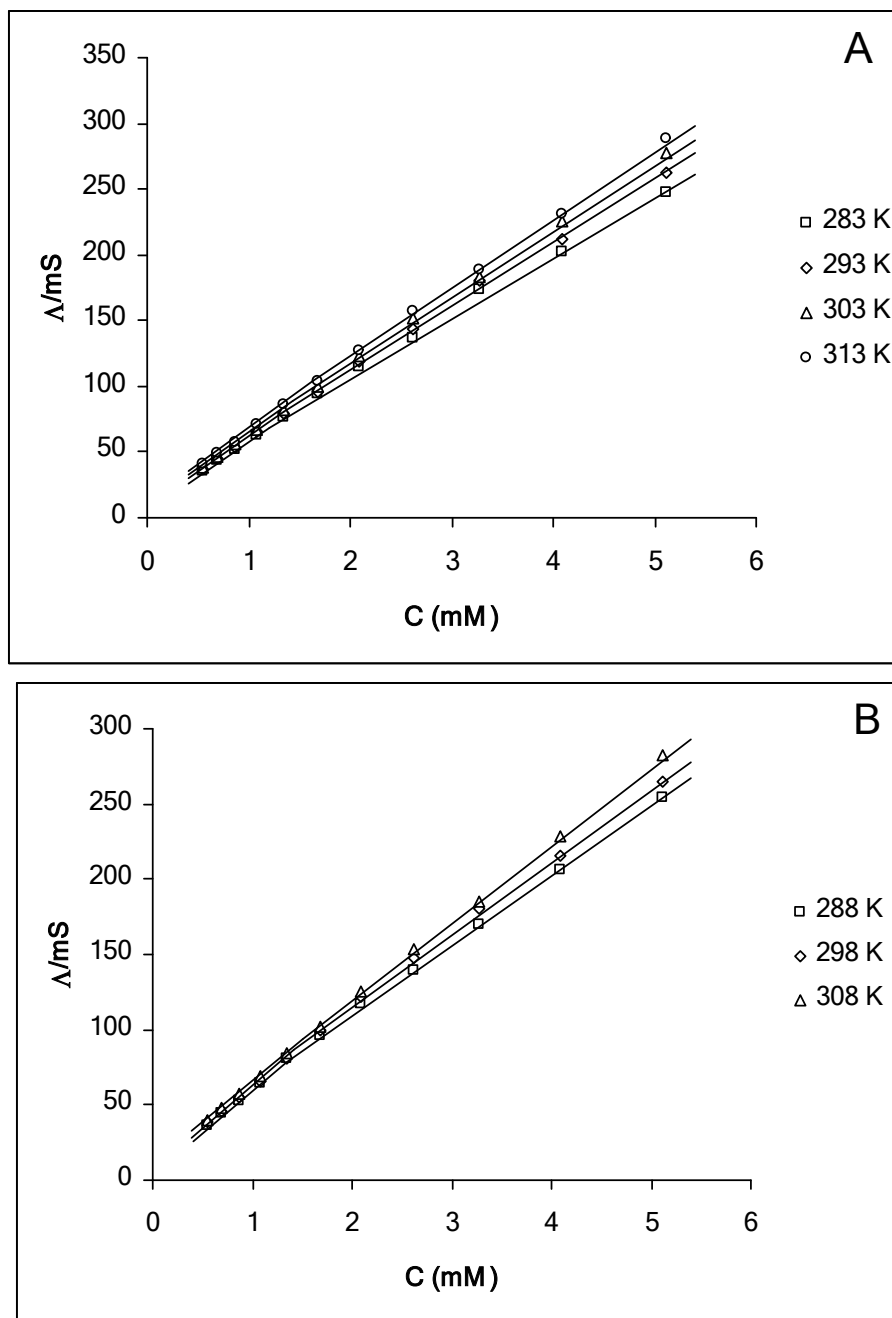

**Figure 3.15:** Conductance,  $\Delta$ , of Tetrapropylammonium dodecyl benzene sulfonate (TPADBS) in aqueous solution as a function of the surfactant concentration at different temperatures (A: temperature 283K, 293K, 303K, 313K), (B: temperature 288K, 298K, 308K).

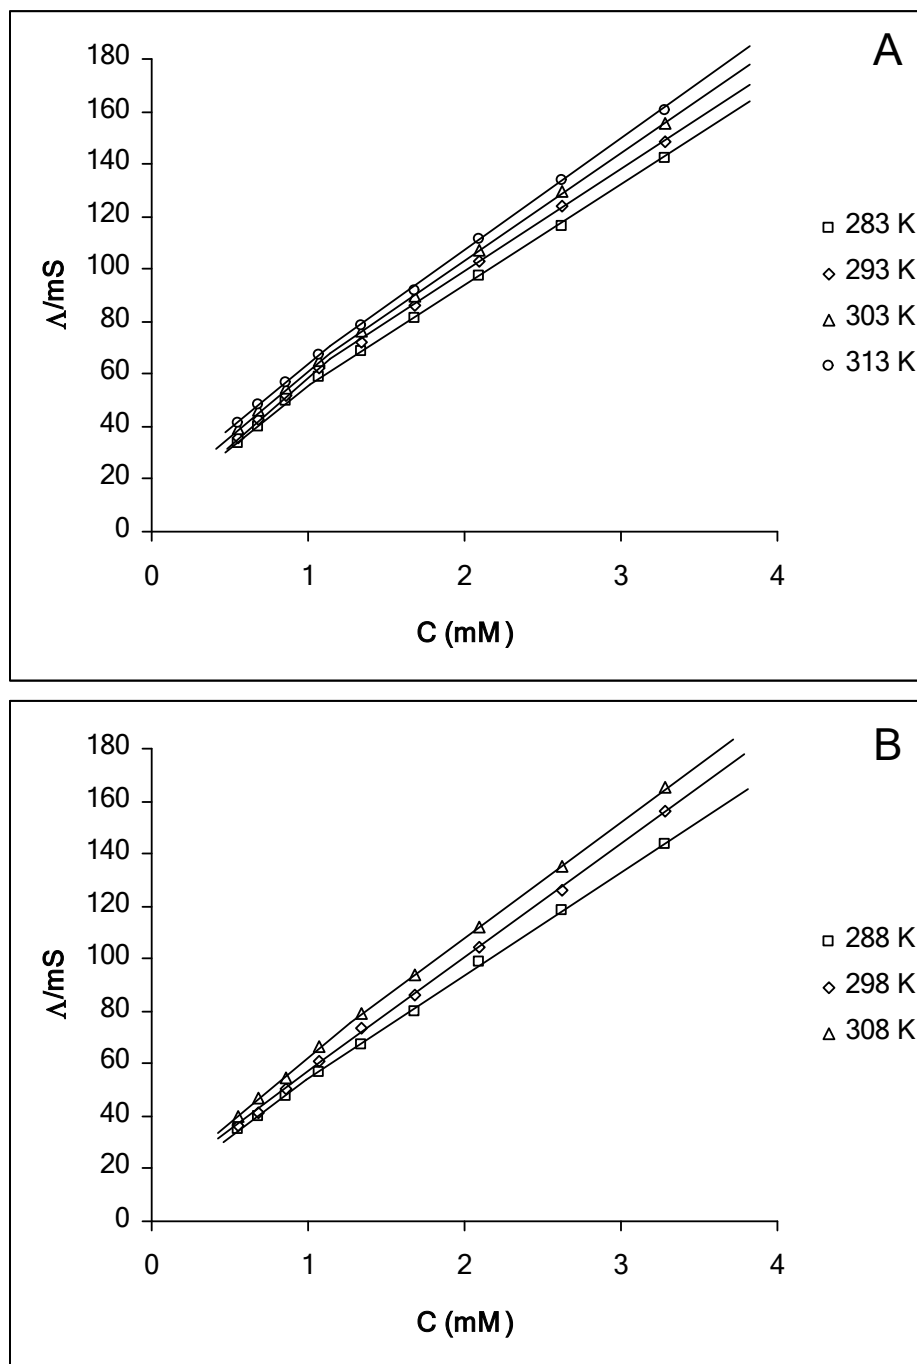

**Figure 3.16:** Conductance,  $\Lambda$ , of Tetrabutylammonium dodecyl benzene sulfonate (TBADBS) in aqueous solution as a function of the surfactant concentration at different temperatures (A: temperature 283K, 293K, 303K, 313K), (B: temperature 288K, 298K, 308K).

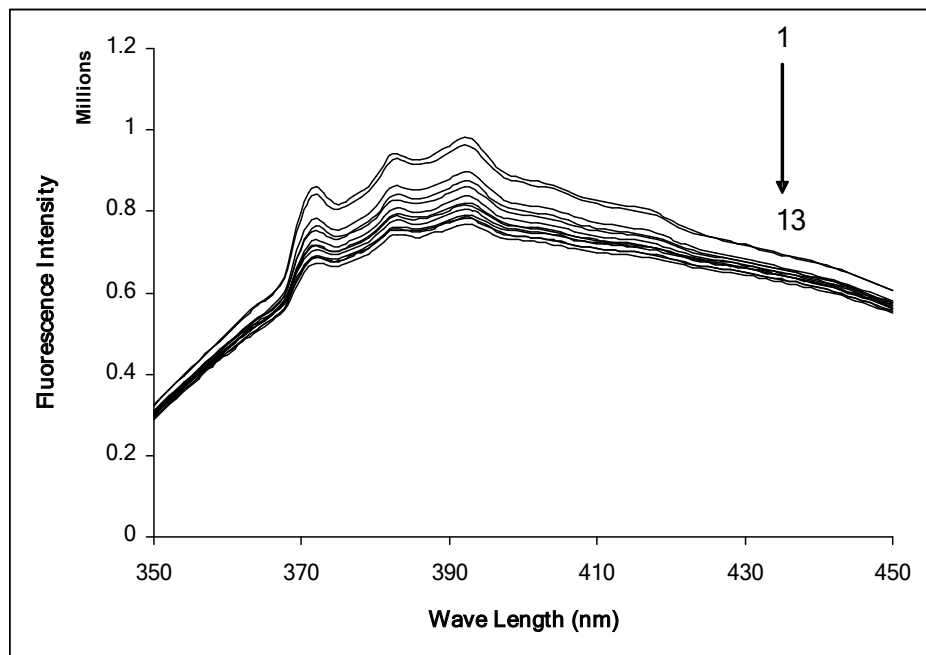

Figure: Fluorescence Spectra of Ammonium dodecyl benzene sulfonate with different concentration of CPC in mM (1) 0.0 mM (2) 0.0054 mM (3) 0.105 mM (4) 0.152 mM (5) 0.196 mM (6) 0.237 mM (7) 0.276 mM (8) 0.312 mM (9) 0.346 mM (10) 0.379 mM (11) 0.409 mM (12) 0.438 mM (13) 0.466 mM

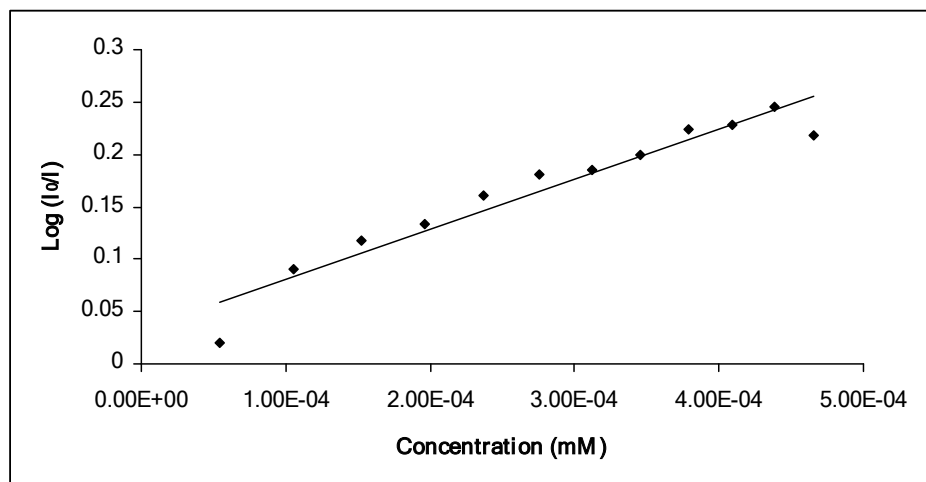

Figure:  $\text{Log}(I_0/I)$  Vs Concentration (mM) plot of Ammonium dodecyl benzene sulfonate.

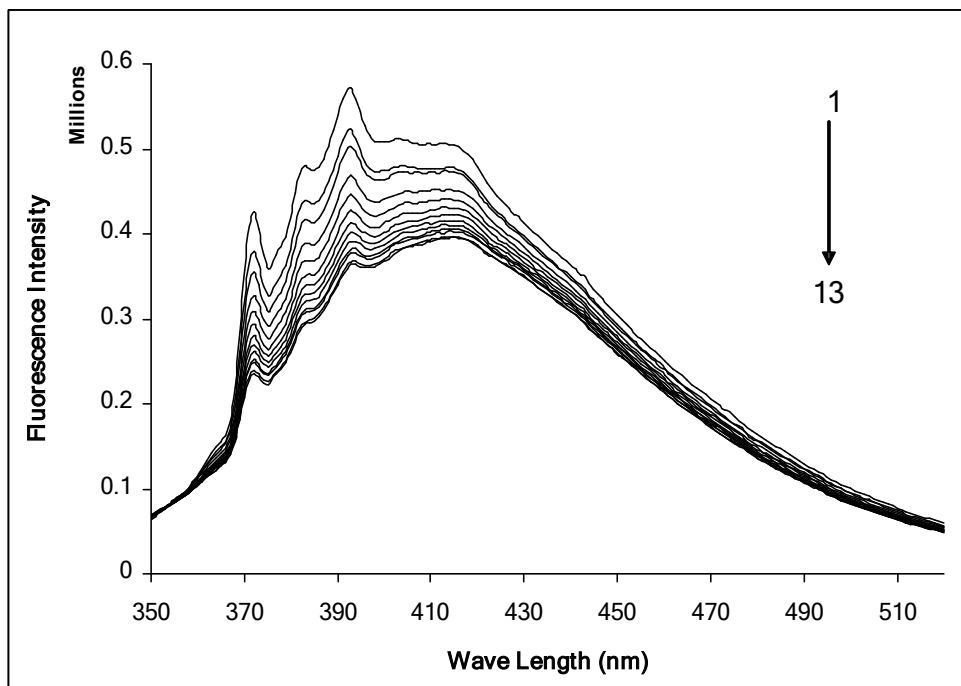

Figure: Fluorescence Spectra of Tetramethyl ammonium dodecyl benzene sulfonate with different concentration of CPC in mM (1) 0.0 mM (2) 0.0054 mM (3) 0.105 mM (4) 0.152 mM (5) 0.196 mM (6) 0.237 mM (7) 0.276 mM (8) 0.312 mM (9) 0.346 mM (10) 0.379 mM (11) 0.409 mM (12) 0.438 mM (13) 0.466 mM

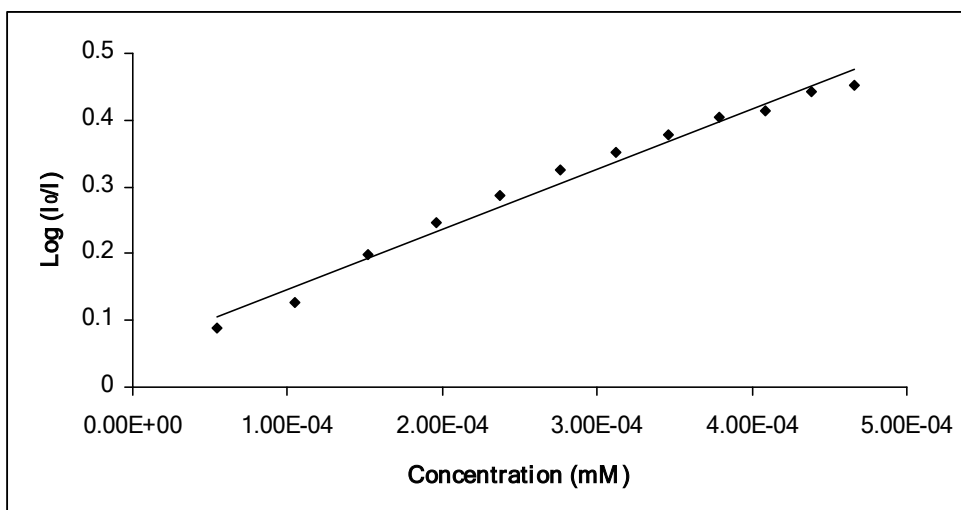

Figure: Log ( $I_0/I$ ) Vs Concentration (mM) plot of Tetramethyl ammonium dodecyl benzene sulfonate.

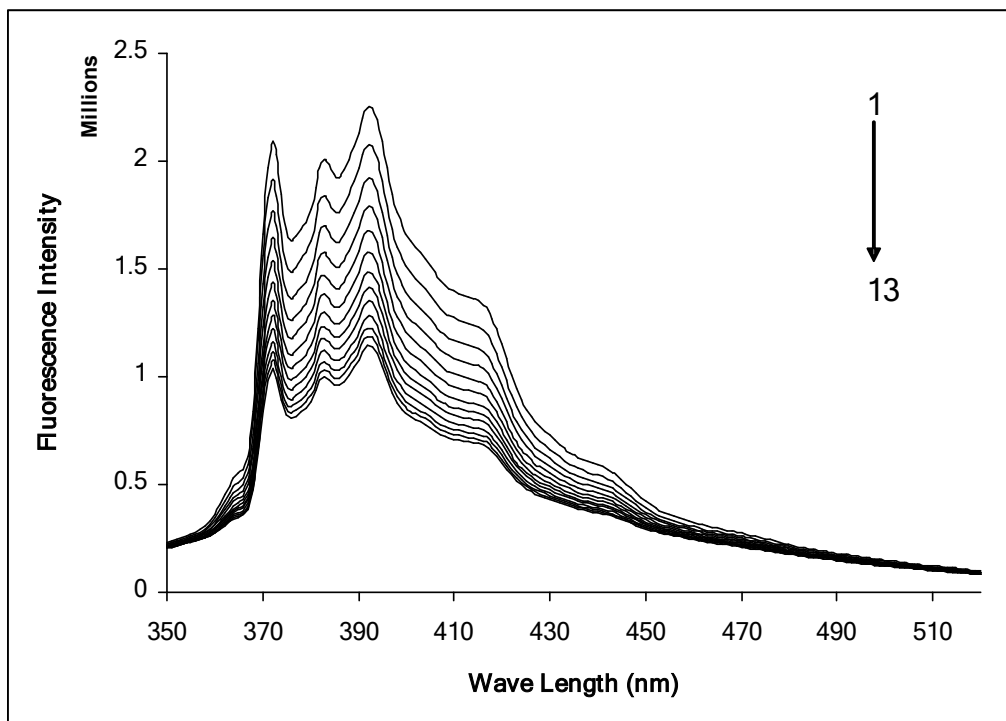

Figure: Fluorescence Spectra of Tetrapropyl ammonium dodecyl benzene sulfonate with different concentration of CPC in mM (1) 0.0 mM (2) 0.0054 mM (3) 0.105 mM (4) 0.152 mM (5) 0.196 mM (6) 0.237 mM (7) 0.276 mM (8) 0.312 mM (9) 0.346 mM (10) 0.379 mM (11) 0.409 mM (12) 0.438 mM (13) 0.466 mM

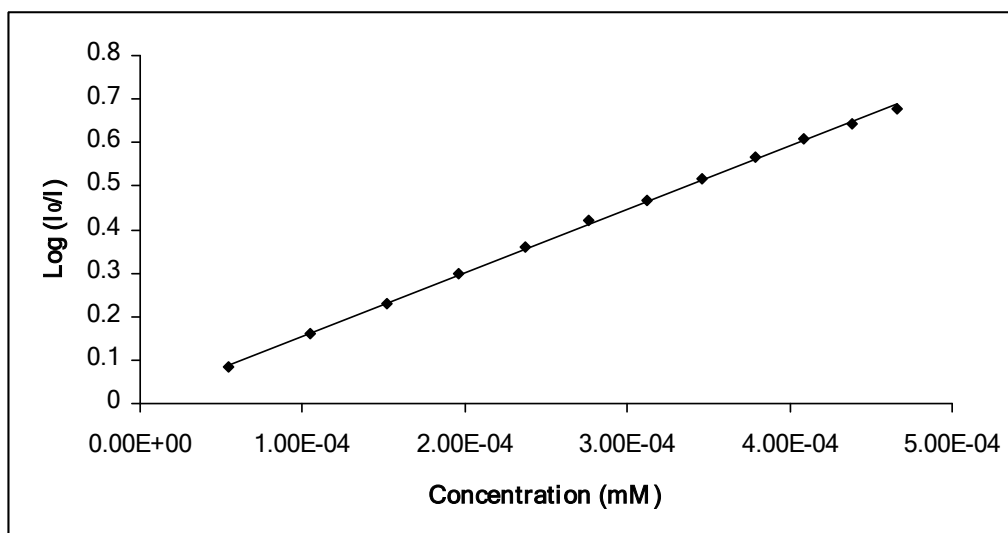

Figure:  $\text{Log}(I_0/I)$  Vs Concentration (mM) plot of Tetrapropylammonium dodecyl benzene sulfonate.

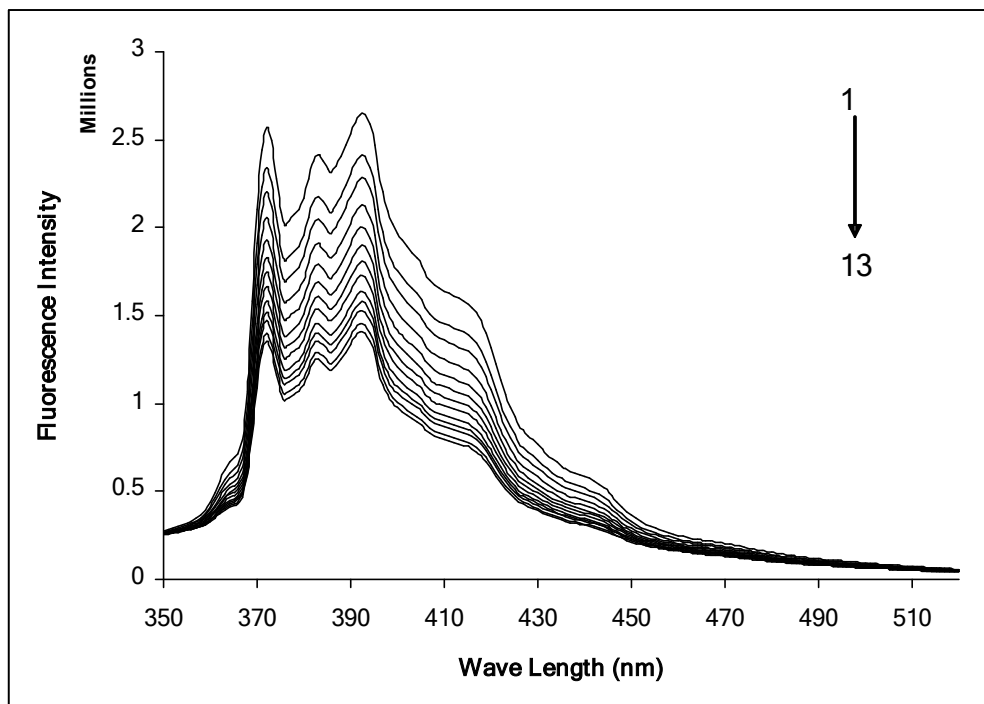

Figure: Fluorescence Spectra of Tetrabutyl ammonium dodecyl benzene sulfonate with different concentration of CPC in mM (1) 0.0 mM (2) 0.0054 mM (3) 0.105 mM (4) 0.152 mM (5) 0.196 mM (6) 0.237 mM (7) 0.276 mM (8) 0.312 mM (9) 0.346 mM (10) 0.379 mM (11) 0.409 (12) 0.438 mM (13) 0.466 mM

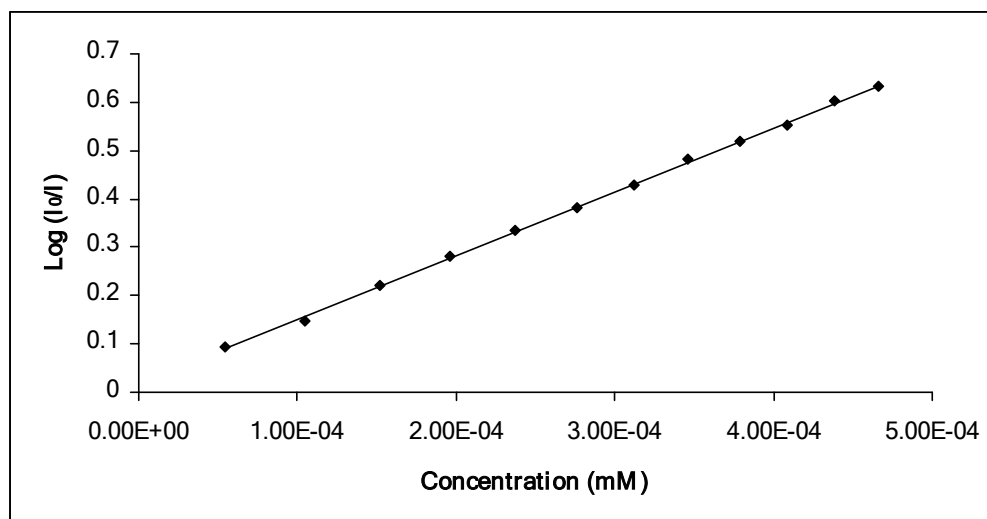

Figure: Log ( $I_0/I$ ) Vs Concentration (mM) plot of Tetrabutyl ammonium dodecyl benzene sulfonate.
